# Supplementary material for: Red fluorescent genetically encoded Ca2+ indicators for use in mitochondria and endoplasmic reticulum
Source: Oxford University Press journal article supplement (doi:10.1042/bj20140931), 2014-08-29
Supplement: bj4640013ntsadd.pdf [file bj4640013ntsadd.pdf]

## SUPPLEMENTARY ONLINE DATA

### Red fluorescent genetically encoded Ca<sup>2+</sup> indicators for use in mitochondria and endoplasmic reticulum

Jiahui WU<sup>\*</sup>, David L. PROLE<sup>†</sup>, Yi SHEN<sup>\*</sup>, Zhihong LIN<sup>‡</sup>, Aswini GNANASEKARAN<sup>‡</sup>, Yingjie LIU<sup>§</sup>, Lidong CHEN<sup>\*</sup>, Hang ZHOU<sup>\*</sup>, S.R. Wayne CHEN<sup>§||</sup>, Yuriy M. USACHEV<sup>‡</sup>, Colin W. TAYLOR<sup>†</sup> and Robert E. CAMPBELL<sup>\*1</sup>

<sup>\*</sup>Department of Chemistry, University of Alberta, Edmonton, Alberta T6G 2G2, Canada

<sup>†</sup>Department of Pharmacology, University of Cambridge, Cambridge CB2 1PD, UK

<sup>‡</sup>Department of Pharmacology, University of Iowa Carver College of Medicine, Iowa City, IA 52242, USA

<sup>§</sup>Department of Physiology and Pharmacology, Libin Cardiovascular Institute of Alberta, University of Calgary, Calgary, Alberta, T2N 4N1, Canada

<sup>||</sup>Department of Biochemistry and Molecular Biology, Libin Cardiovascular Institute of Alberta, University of Calgary, Calgary, Alberta, T2N 4N1, Canada

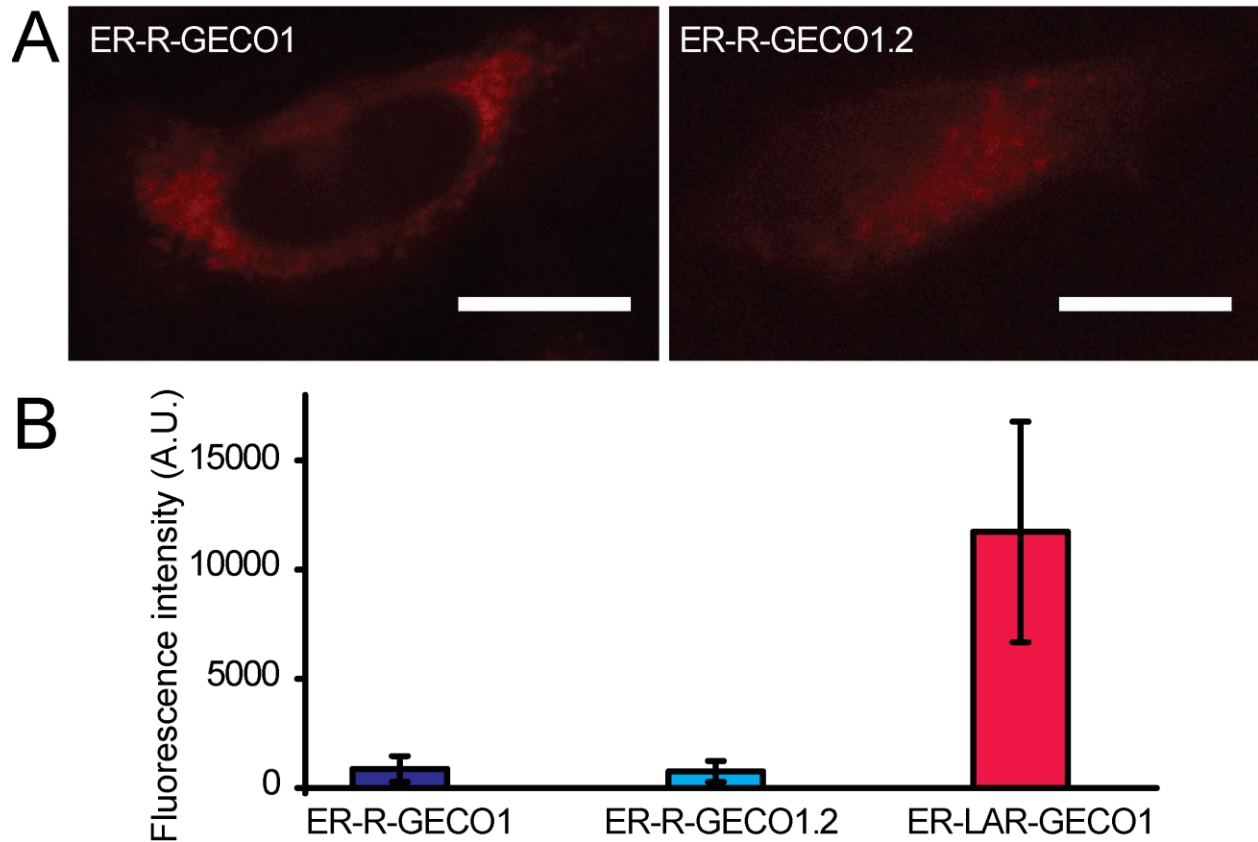

**Figure S1 Diminished brightness of R-GECO1 and R-GECO1.2 in the ER of HeLa cells**

(A) HeLa cells expressing ER-R-GECO1 (left panel) and ER-R-GECO1.2 (right panel), scale bar = 20  $\mu\text{m}$ .

(B) Comparison of the red fluorescence intensities of ER-R-GECO1 ( $n = 67$  cells;  $p \ll 0.001$ ), ER-R-GECO1.2 (86 cells;  $p \ll 0.001$ ) and ER-LAR-GECO1 (57 cells) in HeLa cells.

|             |     |     |     |     |     |     |      |      |      |     |     |     |     |     |     |      |     |     |     |     |     |     |     |     |     |     |     |      |      |     |     |     |     |     |     |     |     |     |     |     |
|-------------|-----|-----|-----|-----|-----|-----|------|------|------|-----|-----|-----|-----|-----|-----|------|-----|-----|-----|-----|-----|-----|-----|-----|-----|-----|-----|------|------|-----|-----|-----|-----|-----|-----|-----|-----|-----|-----|-----|
| GCaMP #s    | 39  | 40  | 41  | 42  | 43  | 44  | 45   | 46   | 47   | 48  | 49  | 50  | 51  | 52  | 53  | 54   | 55  | 56  | 57  | 58  | 59  | 60  | 61  | 62  | 63  | 64  | 65  | 66   | 67   | 68  | 69  | 70  | 71  | 72  | 73  | 74  | 75  | 76  | 77  | 78  |
| R-GECO1     | S   | S   | R   | R   | K   | W   | N    | K    | A    | G   | H   | A   | V   | R   | A   | I    | G   | R   | L   | S   | S   | P   | V   | -   | V   | S   | E   | R    | M    | Y   | P   | E   | D   | G   | A   | L   | K   | S   | E   | I   |
| LAR-GECO1   | S   | S   | R   | R   | K   | W   | N    | K    | A    | G   | H   | A   | W   | R   | A   | I    | G   | R   | L   | S   | S   | P   | V   | -   | V   | S   | E   | R    | M    | Y   | P   | E   | D   | G   | A   | L   | K   | S   | E   | I   |
| R-GECO1.2   | S   | S   | R   | R   | K   | W   | N    | K    | A    | G   | H   | A   | V   | R   | A   | I    | G   | R   | L   | S   | S   | P   | V   | -   | V   | S   | E   | R    | M    | Y   | P   | E   | D   | G   | A   | L   | K   | S   | E   | I   |
| LAR-GECO1.2 | S   | S   | R   | R   | K   | W   | N    | K    | A    | G   | H   | A   | V   | R   | A   | I    | G   | R   | L   | S   | S   | P   | V   | -   | V   | S   | E   | R    | M    | Y   | P   | E   | D   | G   | A   | L   | K   | S   | E   | I   |
| GCaMP #s    | 79  | 80  | 81  | 82  | 83  | 84  | 85   | 86   | 87   | 88  | 89  | 90  | 91  | 92  | 93  | 94   | 95  | 96  | 97  | 98  | 99  | 100 | 101 | 102 | 103 | 104 | 105 | 106  | 107  | 108 | 109 | 110 | 111 | 112 | 113 | 114 | 115 | 116 | 117 | 118 |
| R-GECO1     | K   | K   | G   | L   | R   | L   | K    | D    | G    | G   | H   | Y   | A   | A   | -   | -    | E   | V   | K   | T   | T   | Y   | K   | A   | K   | K   | P   | V    | Q    | L   | P   | G   | A   | Y   | I   | V   | D   | I   | K   | L   |
| LAR-GECO1   | K   | K   | G   | L   | R   | L   | K    | D    | G    | G   | H   | Y   | A   | A   | -   | -    | E   | V   | K   | T   | T   | Y   | K   | A   | K   | K   | P   | V    | Q    | L   | P   | G   | A   | Y   | I   | V   | D   | I   | K   | L   |
| R-GECO1.2   | K   | K   | G   | L   | R   | L   | K    | D    | G    | G   | H   | Y   | A   | A   | -   | -    | E   | V   | K   | T   | T   | Y   | K   | A   | K   | K   | P   | V    | Q    | L   | P   | G   | A   | Y   | I   | V   | D   | I   | K   | L   |
| LAR-GECO1.2 | K   | K   | G   | L   | R   | L   | K    | D    | G    | G   | H   | Y   | A   | A   | -   | -    | E   | V   | K   | T   | T   | Y   | K   | A   | K   | K   | P   | V    | Q    | L   | P   | G   | A   | Y   | I   | V   | D   | I   | K   | L   |
| GCaMP #s    | 119 | 120 | 121 | 122 | 123 | 124 | 125  | 126  | 127  | 128 | 129 | 130 | 131 | 132 | 133 | 134  | 135 | 136 | 137 | 138 | 139 | 140 | 141 | 142 | 143 | 144 | 145 | 146  | 147  | 148 | 149 | 150 | 151 | 152 | 153 | 154 | 155 | 156 | 157 | 158 |
| R-GECO1     | D   | I   | V   | S   | -   | H   | N    | E    | D    | Y   | T   | I   | V   | E   | Q   | C    | E   | R   | A   | E   | G   | R   | H   | S   | T   | G   | G   | M    | D    | E   | L   | Y   | K   | G   | G   | T   | G   | S   | L   |     |
| LAR-GECO1   | D   | I   | V   | S   | -   | H   | N    | E    | D    | Y   | T   | I   | V   | E   | Q   | C    | E   | R   | A   | E   | G   | R   | H   | S   | T   | G   | G   | M    | D    | E   | L   | Y   | K   | G   | G   | T   | G   | S   | L   |     |
| R-GECO1.2   | D   | I   | V   | S   | -   | H   | N    | E    | D    | Y   | T   | I   | V   | E   | Q   | C    | E   | R   | A   | E   | G   | R   | H   | S   | T   | G   | G   | M    | D    | E   | L   | Y   | K   | G   | G   | T   | G   | S   | L   |     |
| LAR-GECO1.2 | D   | I   | V   | S   | -   | H   | N    | E    | D    | Y   | T   | I   | V   | E   | Q   | C    | E   | R   | A   | V   | G   | R   | H   | S   | T   | G   | G   | M    | D    | E   | L   | Y   | K   | G   | G   | T   | G   | S   | L   |     |
| GCaMP #s    | 159 | 160 | 161 | 162 | 163 | 164 | 164a | 164b | 164c | 165 | 166 | 167 | 168 | 169 | 170 | 171  | 172 | 173 | 174 | 175 | 176 | 177 | 178 | 179 | 180 | 181 | 182 | 183  | 184  | 185 | 186 | 187 | 188 | 189 | 190 | 191 | 192 | 193 | 194 |     |
| R-GECO1     | V   | S   | K   | G   | E   | E   | D    | N    | R    | A   | I   | I   | K   | E   | F   | M    | R   | F   | K   | V   | H   | M   | E   | G   | S   | V   | N   | G    | H    | E   | F   | E   | I   | E   | G   | E   | G   | E   | G   | R   |
| LAR-GECO1   | V   | S   | K   | G   | E   | E   | D    | N    | R    | A   | I   | I   | K   | E   | F   | M    | R   | F   | K   | V   | H   | M   | E   | G   | S   | V   | N   | G    | H    | E   | F   | E   | I   | E   | G   | E   | G   | E   | G   | R   |
| R-GECO1.2   | V   | S   | K   | G   | E   | E   | D    | N    | R    | A   | I   | V   | K   | E   | F   | M    | R   | F   | K   | L   | H   | M   | E   | G   | S   | V   | N   | G    | H    | E   | F   | E   | I   | E   | G   | E   | G   | E   | G   | R   |
| LAR-GECO1.2 | V   | S   | K   | G   | E   | E   | D    | N    | R    | A   | I   | V   | K   | E   | F   | M    | R   | F   | K   | L   | H   | M   | E   | G   | S   | V   | N   | G    | H    | E   | F   | E   | I   | E   | G   | E   | G   | E   | G   | R   |
| GCaMP #s    | 195 | 196 | 197 | 198 | 199 | 200 | 201  | 202  | 203  | 204 | 205 | 206 | 207 | 208 | 209 | 209a | 210 | 211 | 212 | 213 | 214 | 215 | 216 | 217 | 218 | 219 | 220 | 221  | 222  | 223 | 224 | 225 | 226 | 227 | 228 | 229 | 230 | 231 | 232 | 233 |
| R-GECO1     | P   | Y   | E   | A   | F   | Q   | T    | A    | K    | L   | K   | V   | T   | K   | G   | G    | P   | L   | P   | F   | A   | W   | D   | I   | L   | S   | P   | Q    | F    | M   | Y   | G   | S   | K   | A   | Y   | I   | K   | H   | P   |
| LAR-GECO1   | P   | Y   | E   | A   | F   | Q   | T    | A    | K    | L   | K   | V   | T   | K   | G   | G    | P   | L   | P   | F   | A   | W   | D   | I   | L   | S   | P   | Q    | F    | M   | Y   | G   | S   | K   | A   | Y   | I   | K   | H   | P   |
| R-GECO1.2   | P   | Y   | E   | A   | F   | Q   | T    | A    | K    | L   | K   | V   | T   | K   | G   | G    | P   | L   | P   | F   | A   | W   | D   | I   | L   | S   | P   | Q    | L    | M   | Y   | G   | S   | K   | A   | Y   | I   | K   | H   | P   |
| LAR-GECO1.2 | P   | Y   | E   | A   | F   | Q   | T    | A    | K    | L   | K   | V   | T   | K   | G   | G    | P   | L   | P   | F   | A   | W   | D   | I   | L   | S   | P   | Q    | L    | M   | Y   | G   | S   | K   | A   | Y   | I   | K   | H   | P   |
| GCaMP #s    | 234 | 235 | 236 | 237 | 238 | 239 | 240  | 241  | 242  | 243 | 244 | 245 | 246 | 247 | 248 | 249  | 250 | 251 | 252 | 253 | 254 | 255 | 256 | 257 | 258 | 259 | 260 | 261  | 262  | 263 | 264 | 265 | 266 | 267 | 268 | 269 | 270 | 271 | 272 | 273 |
| R-GECO1     | A   | D   | I   | P   | -   | -   | D    | Y    | F    | K   | L   | S   | F   | P   | E   | G    | F   | R   | W   | E   | R   | V   | M   | N   | F   | E   | D   | G    | G    | I   | I   | H   | V   | N   | Q   | D   | S   | S   | L   | Q   |
| LAR-GECO1   | A   | D   | I   | P   | -   | -   | D    | Y    | F    | K   | L   | S   | F   | P   | E   | G    | F   | R   | W   | E   | R   | V   | M   | N   | F   | E   | D   | G    | G    | I   | I   | H   | V   | N   | Q   | D   | S   | S   | L   | Q   |
| R-GECO1.2   | A   | D   | I   | P   | -   | -   | D    | Y    | F    | K   | L   | S   | F   | P   | E   | G    | F   | R   | W   | E   | R   | V   | M   | N   | F   | E   | D   | G    | G    | I   | I   | H   | V   | N   | Q   | D   | T   | S   | L   | Q   |
| LAR-GECO1.2 | A   | D   | I   | P   | -   | -   | D    | Y    | F    | K   | L   | S   | F   | P   | E   | G    | F   | R   | W   | E   | R   | V   | M   | N   | F   | E   | D   | G    | G    | I   | I   | H   | V   | N   | Q   | D   | T   | S   | L   | Q   |
| GCaMP #s    | 274 | 275 | 276 | 277 | 278 | 279 | 280  | 281  | 282  | 283 | 284 | 285 | 286 | 287 | 288 | 289  | 290 | 291 | 292 | 293 | 294 | 295 | 296 | 297 | 298 | 299 | 300 | 300a | 300b | 301 | 302 | 303 | 304 | 305 | 306 | 307 | 308 | 309 | 310 | 311 |
| R-GECO1     | D   | G   | V   | F   | I   | Y   | K    | V    | K    | L   | R   | G   | T   | N   | F   | P    | P   | D   | G   | P   | V   | M   | Q   | K   | K   | T   | M   | G    | W    | E   | A   | T   | R   | D   | Q   | L   | T   | E   | E   | Q   |
| LAR-GECO1   | D   | G   | V   | F   | I   | Y   | K    | V    | K    | L   | R   | G   | T   | N   | F   | P    | P   | D   | G   | P   | V   | M   | Q   | K   | K   | T   | M   | G    | W    | E   | A   | T   | R   | D   | Q   | L   | T   | E   | E   | Q   |
| R-GECO1.2   | D   | G   | V   | F   | I   | Y   | K    | V    | K    | L   | R   | G   | T   | N   | F   | P    | P   | D   | G   | P   | V   | M   | Q   | K   | K   | T   | M   | G    | W    | E   | A   | T   | R   | D   | Q   | L   | T   | E   | E   | Q   |
| LAR-GECO1.2 | D   | G   | V   | F   | I   | Y   | K    | V    | K    | L   | R   | G   | T   | N   | F   | P    | P   | D   | G   | P   | V   | M   | Q   | K   | K   | T   | M   | G    | W    | E   | A   | T   | R   | D   | Q   | L   | T   | E   | E   | Q   |
| GCaMP #s    | 312 | 313 | 314 | 315 | 316 | 317 | 318  | 319  | 320  | 321 | 322 | 323 | 324 | 325 | 326 | 327  | 328 | 329 | 330 | 331 | 332 | 333 | 334 | 335 | 336 | 337 | 338 | 339  | 340  | 341 | 342 | 343 | 344 | 345 | 346 | 347 | 348 | 349 | 350 | 351 |
| R-GECO1     | I   | A   | E   | F   | K   | E   | A    | F    | S    | L   | F   | D   | K   | D   | G   | D    | G   | T   | I   | T   | T   | K   | E   | L   | G   | T   | V   | M    | R    | S   | L   | G   | Q   | N   | P   | T   | E   | A   | E   | L   |
| LAR-GECO1   | I   | A   | E   | F   | K   | E   | A    | F    | S    | L   | F   | D   | K   | D   | G   | D    | G   | T   | I   | T   | T   | K   | E   | L   | G   | T   | V   | M    | R    | S   | L   | G   | Q   | N   | P   | T   | E   | A   | E   | L   |
| R-GECO1.2   | I   | A   | E   | F   | K   | E   | A    | F    | S    | L   | F   | D   | K   | D   | G   | D    | G   | T   | M   | T   | T   | K   | E   | L   | G   | T   | V   | M    | R    | S   | L   | G   | Q   | N   | P   | T   | E   | A   | E   | L   |
| LAR-GECO1.2 | I   | A   | E   | F   | K   | E   | A    | F    | S    | L   | F   | D   | K   | D   | G   | D    | G   | T   | M   | T   | T   | K   | E   | L   | G   | T   | V   | M    | R    | S   | L   | G   | Q   | N   | P   | T   | E   | A   | E   | L   |
| GCaMP #s    | 352 | 353 | 354 | 355 | 356 | 357 | 358  | 359  | 360  | 361 | 362 | 363 | 364 | 365 | 366 | 367  | 368 | 369 | 370 | 371 | 372 | 373 | 374 | 375 | 376 | 377 | 378 | 379  | 380  | 381 | 382 | 383 | 384 | 385 | 386 | 387 | 388 | 389 | 390 | 391 |
| R-GECO1     | Q   | D   | M   | I   | N   | E   | V    | D    | A    | D   | G   | D   | G   | T   | F   | D    | F   | P   | E   | F   | L   | T   | M   | M   | A   | R   | K   | M    | N    | D   | T   | D   | S   | E   | E   | E   | I   | R   | E   | A   |
| LAR-GECO1   | Q   | D   | M   | I   | N   | E   | V    | D    | A    | D   | G   | D   | G   | T   | F   | D    | F   | P   | E   | F   | L   | T   | M   | M   | A   | R   | K   | M    | N    | D   | T   | D   | S   | E   | E   | E   | I   | R   | E   | A   |
| R-GECO1.2   | Q   | D   | M   | I   | N   | E   | V    | D    | A    | D   | G   | D   | G   | T   | F   | D    | F   | P   | E   | F   | L   | T   | M   | M   | A   | R   | K   | M    | N    | D   | T   | D   | S   | E   | E   | E   | I   | R   | E   | A   |
| LAR-GECO1.2 | Q   | D   | M   | I   | N   | E   | V    | D    | A    | D   | G   | D   | G   | T   | F   | D    | F   | P   | E   | F   | L   | T   | M   | M   | A   | R   | K   | M    | N    | D   | T   | D   | S   | E   | E   | E   | I   | R   | E   | A   |
| GCaMP #s    | 392 | 393 | 394 | 395 | 396 | 397 | 398  | 399  | 400  | 401 | 402 | 403 | 404 | 405 | 406 | 407  | 408 | 409 | 410 | 411 | 412 | 413 | 414 | 415 | 416 | 417 | 418 | 419  | 420  | 421 | 422 | 423 | 424 | 425 | 426 | 427 | 428 | 429 | 430 | 431 |
| R-GECO1     | F   | R   | V   | F   | D   | K   | D    | G    | N    | G   | Y   | I   | G   | A   | A   | E    | L   | R   | H   | V   | M   | T   | D   | L   | G   | E   | K   | L    | T    | D   | E   | E   | V   | D   | E   | M   | I   | R   | V   | A   |
| LAR-GECO1   | F   | R   | V   | F   | D   | K   | D    | G    | N    | G   | Y   | I   | G   | A   | A   | E    | L   | R   | H   | V   | M   | T   | D   | L   | G   | E   | K   | L    | T    | D   | E   | E   | V   | D   | E   | M   | I   | R   | V   | A   |
| R-GECO1.2   | F   | R   | V   | F   | D   | K   | D    | G    | N    | G   | Y   | I   | G   | A   | A   | E    | L   | R   | H   | V   | M   | T   | D   | L   | G   | E   | K   | L    | T    | D   | E   | E   | V   | D   | E   | M   | I   | R   | V   | A   |
| LAR-GECO1.2 | F   | R   | V   | F   | D   | K   | D    | G    | N    | G   | Y   | I   | G   | A   | A   | E    | L   | R   | H   | V   | M   | T   | D   | L   | G   | E   | K   | L    | T    | D   | E   | E   | V   | D   | E   | M   | I   | R   | V   | A   |
| GCaMP #s    | 432 | 433 | 434 | 435 | 436 | 437 | 438  | 439  | 440  | 441 | 442 | 443 | 444 | 445 | 446 | 447  | 448 | 449 | 450 | 451 |     |     |     |     |     |     |     |      |      |     |     |     |     |     |     |     |     |     |     |     |
| R-GECO1     | D   | I   | D   | G   | D   | G   | Q    | V    | N    | Y   | E   | E   | F   | V   | Q   | M    | M   | T   | A   | K   |     |     |     |     |     |     |     |      |      |     |     |     |     |     |     |     |     |     |     |     |

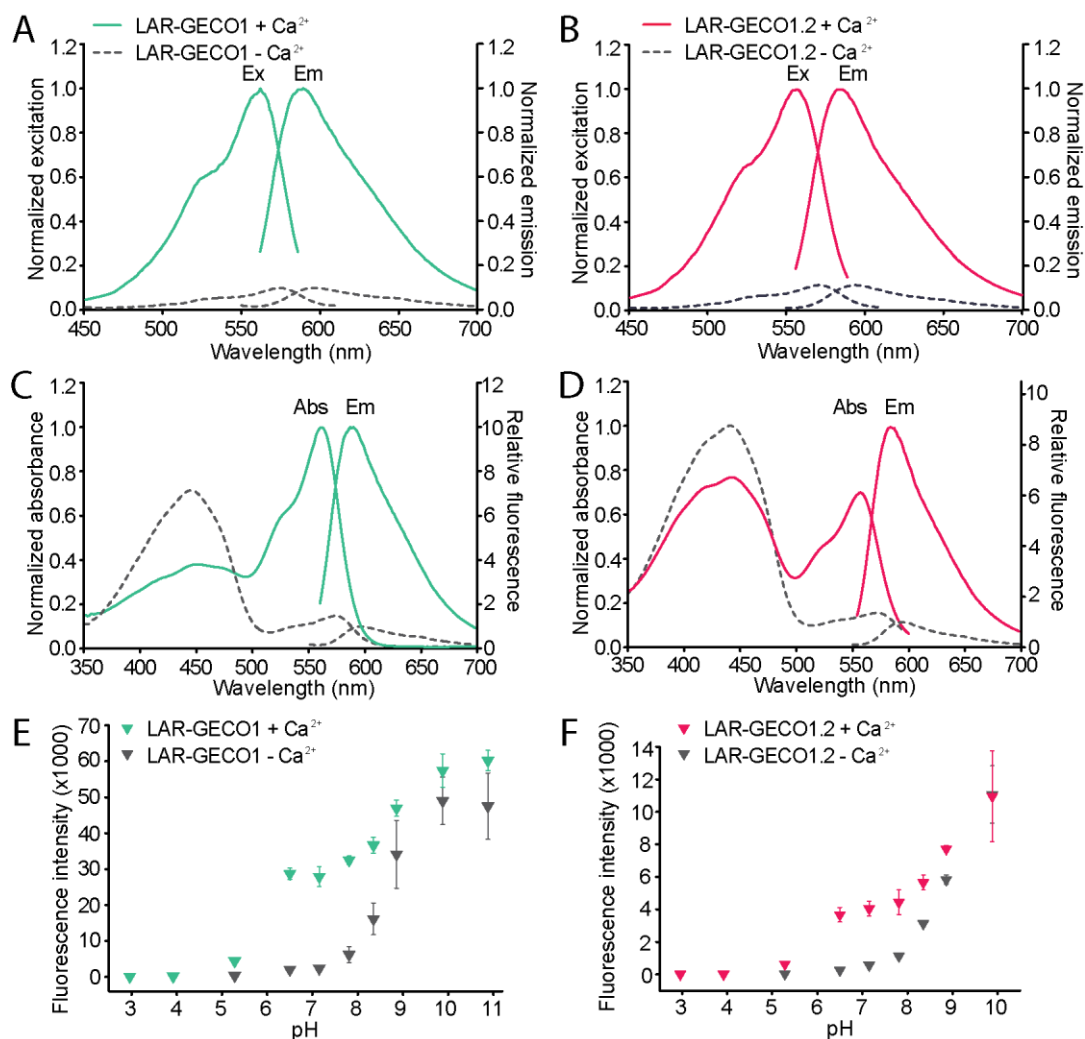

**Figure S3 Characterization of LAR-GECO1 and LAR-GECO1.2**

For (A-D), the Ca<sup>2+</sup>-free state is represented with a dotted line and the Ca<sup>2+</sup>-bound state by a solid line. All spectra were measured as previously described [6].

(A and B) Excitation (Ex) and emission (Em) spectra of LAR-GECO1 (A) and LAR-GECO1.2 (B) in the Ca<sup>2+</sup>-free and Ca<sup>2+</sup>-bound states.

(C and D) Absorbance (Abs) and emission (Em) spectra of LAR-GECO1 (C) and LAR-GECO1.2 (D) in the Ca<sup>2+</sup>-free and Ca<sup>2+</sup>-bound states.

(E and F) Fluorescence intensities of LAR-GECO1 (E) and LAR-GECO1.2 (F) as a function of pH.

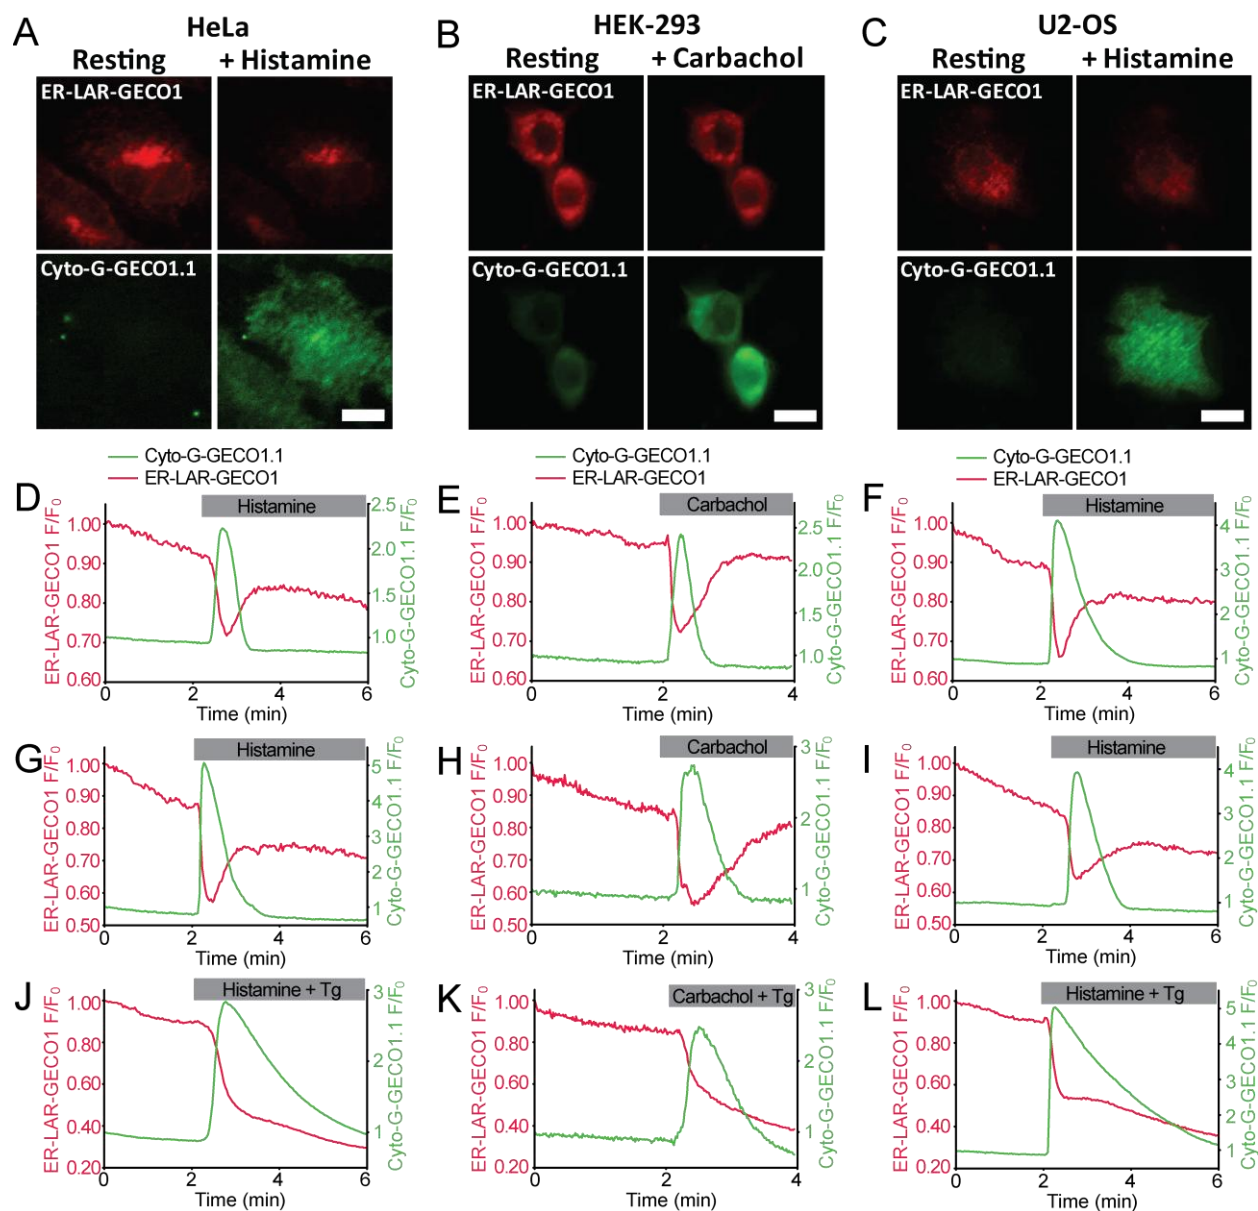

**Figure S4 Characterization of ER-LAR-GECO1 in HeLa, HEK-293 and U2-OS cells**

(A) HeLa cells, (B) HEK-293 cells and (C) a U2-OS cell co-expressing ER-LAR-GECO1 (red) and Cyto-G-GECO1.1 (green), imaged in the resting state (left panels) and after treatment with histamine (100  $\mu$ M, right panels). Images after treatment with histamine correspond to the time of maximal increase in the fluorescence intensity of Cyto-G-GECO1.1. Scale bars = 10  $\mu$ m.

(D-L) Effects of the release of ER Ca<sup>2+</sup> evoked by histamine (100  $\mu$ M) or carbachol (1 mM) applied alone or with thapsigargin (Tg, 10  $\mu$ M), on the fluorescence intensities of ER-LAR-GECO1 (red lines) and Cyto-G-GECO1.1 (green lines) co-expressed in HeLa cells (DGJ), HEK-293 cells (EHK) and U2-OS cells (FIL). Cells were bathed in HBS (D-F and J-L) or nominally Ca<sup>2+</sup>-free HBS (G-I). Each trace shows the response from a single cell, and is representative of at least 4 similar recordings.

**Table S1** List of substitutions for new GECOs described in this work. Residues are numbered as described in **Figure S2**

| <b>Protein</b> | <b>LAR-GECO1 substitutions relative to R-GECO1<br/>LAR-GECO1.2 substitutions relative to R-GECO1.2</b> |
|----------------|--------------------------------------------------------------------------------------------------------|
| LAR-GECO1      | V51W, I113V, N356S, D381Y, F395A, V411A, L415I                                                         |
| LAR-GECO1.2    | N45I, A47R, E138V, K324E                                                                               |
